# Supplementary material for: CD4 counting technologies for HIV therapy monitoring in resource-poor settings – state-of-the-art and emerging microtechnologies
Source: Royal Society of Chemistry journal article supplement (doi:10.1039/c3lc50213a), 2013-01-01
Supplement: c3lc50213a.pdf [file c3lc50213a.pdf]

Supplementary Information for “CD4 Counting Technologies for HIV Therapy Monitoring in Resource-Poor Settings – State-of-the-Art and Emerging Microtechnologies”

Table S1 – Details of protocol steps for the operation of CD4+ counting POC devices

| Instrument            | # Steps      | Details                                                                                                                                                                                                          |
|-----------------------|--------------|------------------------------------------------------------------------------------------------------------------------------------------------------------------------------------------------------------------|
| <b>BD FACSCalibur</b> | <b>7</b>     | Blood collection<br>Vortex and incubate<br>Fixative added and incubate<br>Vortex<br>Transfer sample to instrument<br>Instrument run<br>Read result                                                               |
| <b>BD FACSCount</b>   | <b>7</b>     | Blood collection<br>Vortex and incubate<br>Fixative added and incubate<br>Vortex<br>Transfer sample to instrument<br>Instrument run<br>Read result                                                               |
| <b>Partec miniPOC</b> | <b>7</b>     | Lancet finger<br>Pipette 20µl blood from finger prick<br>Add blood to tube and incubate<br>Add buffer and shake gently<br>Refill syringe<br>Attach to instrument<br>Read result                                  |
| <b>Alere Pima</b>     | <b>4</b>     | Lancet finger<br>Apply drops directly to cartridge and close<br>Insert cartridge into analyser<br>Read result                                                                                                    |
| <b>Daktari</b>        | <b>4</b>     | Lancet finger<br>Apply drops to cartridge<br>Insert cartridge into analyser and start<br>Read result                                                                                                             |
| <b>MBio</b>           | <b>5</b>     | Lancet finger<br>Apply drops to cartridge<br>Insert cartridge to rack and incubate<br>Remove and insert cartridge to reader<br>Read result                                                                       |
| <b>Zyomyx</b>         | <b>7</b>     | Lancet finger<br>Take blood sample into capillary tube<br>Apply blood to cartridge<br>Place cartridge into mixer and spin<br>Twist top of the cartridge<br>Spin<br>Read result                                   |
| <b>Omega Visitect</b> | <b>5 / 6</b> | Lancet finger<br>Take blood sample into MicroSafe pipette and incubate<br>Apply sample to Well A and incubate<br>Apply buffer to Well B and incubate<br>(optional) Insert cartridge to instrument<br>Read result |
